# Supplementary material
Source: PubMed Central journal article supplement (PMC2080862)

## Supplementary Data

### **Tissue-specific regulation of the mouse $\alpha$ A-crystallin gene in lens via recruitment of Pax6 and c-Maf to its promoter**

Ying Yang and Ales Cvekl\*

The Departments of Ophthalmology and Visual Sciences and Molecular Genetics, Albert Einstein College of Medicine, Bronx, NY10461.

\*Corresponding author: Departments of Ophthalmology and Visual Sciences and Molecular Genetics, Albert Einstein College of Medicine, 909 Ullmann, 1300 Morris Park Avenue, Bronx, NY 10461, USA. Telephone: (718) 430-3217. Fax: (718) 430-8778. E-mail: [cvekl@aecom.yu.edu](mailto:cvekl@aecom.yu.edu).

Supplementary Figure 1.

The regulation of mouse  $\alpha$ A-crystallin promoter activity in cultured lens epithelial cells. The promoter fragment -111 to +46 was co-transfected with cDNAs encoding Pax6/Pax6 (5a), MafB and c-Maf (panel A) and Pax6/Pax6(5a), c-Maf, MafA and NRL (panel B) as in mouse  $\alpha$ TN4-1 cells. The amounts of expression plasmids were similar as in Fig. 9.

# Supplementary Figure 1

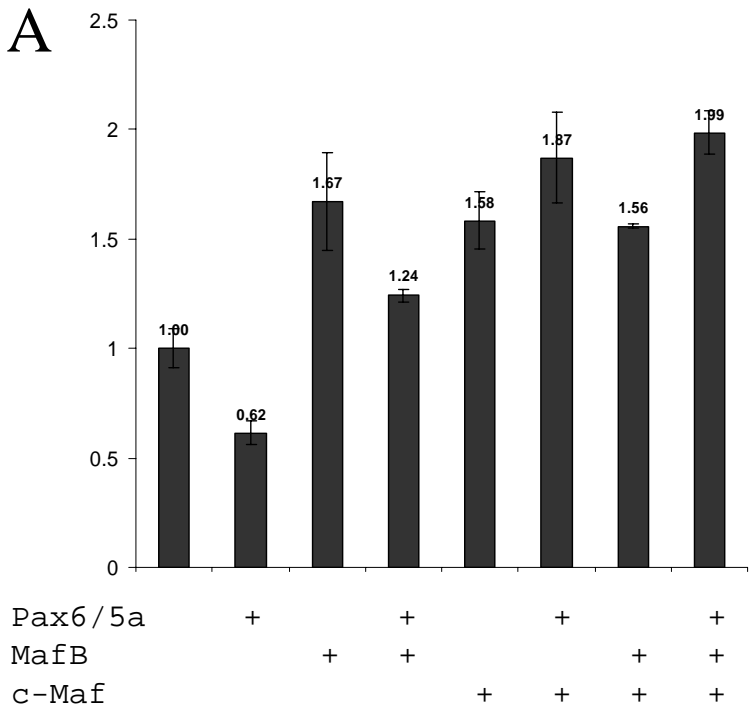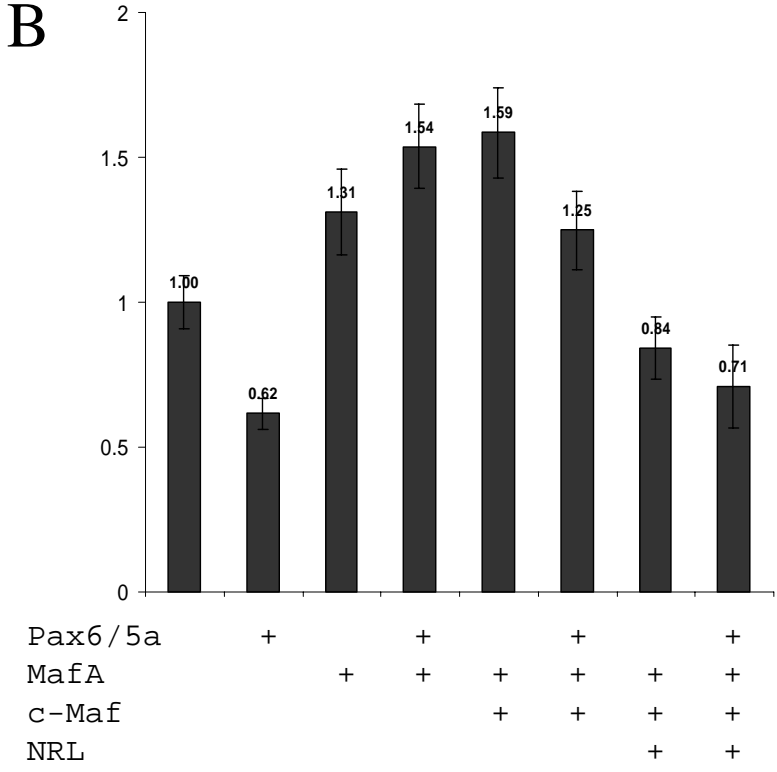

Supplement: NIHMS32521-supplement-supp.pdf [file NIHMS32521-supplement-supp.pdf]
